# Supplementary material
Source: Springer Nature journal article supplement (https://www.springermedizin.de/resource/supplementary/12882_2011_363_MOESM5_ESM.pdf/9453698)

**A**

### Change in eGFR PKD 2

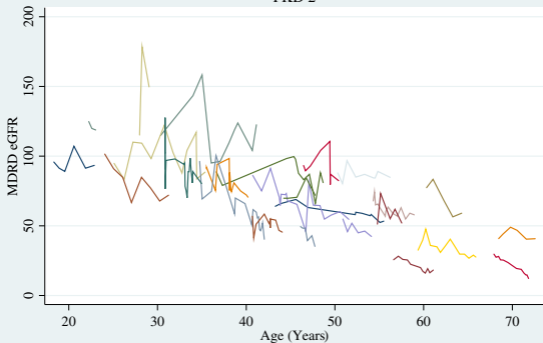**B**

### Change in eGFR Non-PKD2

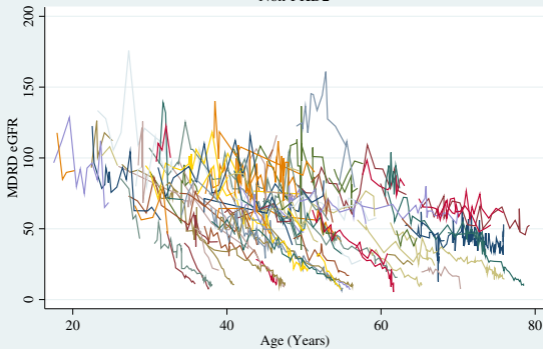

Supplement: MOESM5 [file 9453698]
